# Supplementary material for: Synthesis and Characterization of Superhydrophobic Epoxy Resin Coating with SiO2@CuO/HDTMS for Enhanced Self-Cleaning, Photocatalytic, and Corrosion-Resistant Properties
Source: MDPI journal article supplement (doi:10.3390/ma17081849), 2024-04-17
Supplement: s1 [file s1]

## Supporting Information

Synthesis and Characterization of Superhydrophobic Epoxy Resin  
Coating with  $\text{SiO}_2\text{@CuO}$ /HDTMS for Enhanced Self-Cleaning,  
Photocatalytic, and Corrosion-Resistant Properties

Zhongmin Wang, Xiaoyu Zhou, Yongwei Shang, Bingkui Wang, Kecheng Lu,  
Weijiang Gan, Huajun Lai, Jiang Wang, Caimin Huang, Zongning Chen,  
Chenggang Hao, Enlang Feng and Jiacheng Li

**Table S1.** A comparison was conducted to assess the contact angle between our developed coating and the commercially available superhydrophobic coating (Ultra-ever Dry®).

| No. | Substrate       | Coating                     | Superhydrophobicity | Ref.      |
|-----|-----------------|-----------------------------|---------------------|-----------|
| 1   | Stainless steel | Ultra-ever Dry®             | WCA = 155.0°        | [1]       |
| 2   | Glass slides    | Ultra-ever Dry®             | WCA = 151.2°        | [2]       |
| 3   | Glass slides    | Ultra-ever Dry®             | WCA = 152.6°        | [3]       |
| 4   | Nylon mesh      | Ultra-ever Dry®             | WCA = 151.3°        | [4]       |
| 5   | Carbon fiber    | Ultra-ever Dry®             | WCA = 161.2°        | [5]       |
| 6   | Aluminum alloy  | Ultra-ever Dry®             | WCA = 157.6°        | [6]       |
| 7   | Aluminum alloy  | SiO <sub>2</sub> @CuO/HDTMS | WCA = 157.4°        | This work |

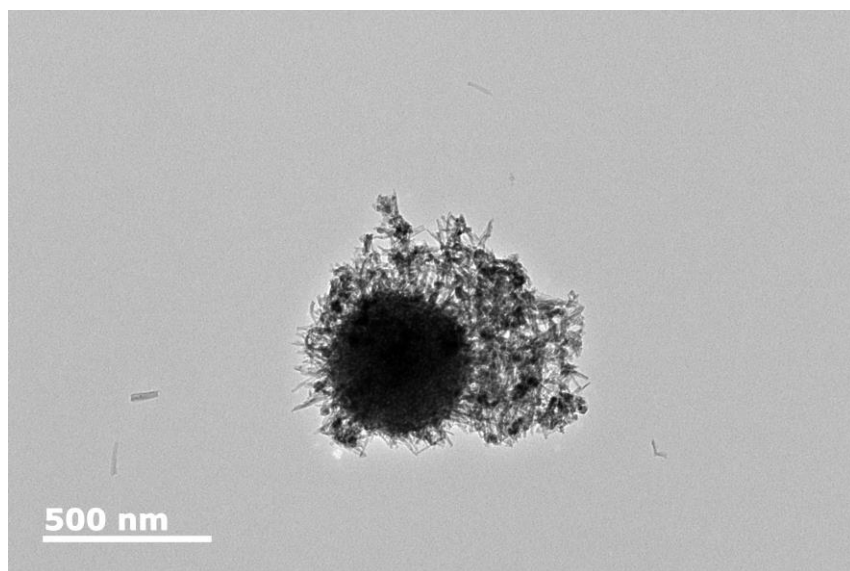

**Figure S1.** TEM images of SiO<sub>2</sub>@CuO/HDTMS nanoparticle.

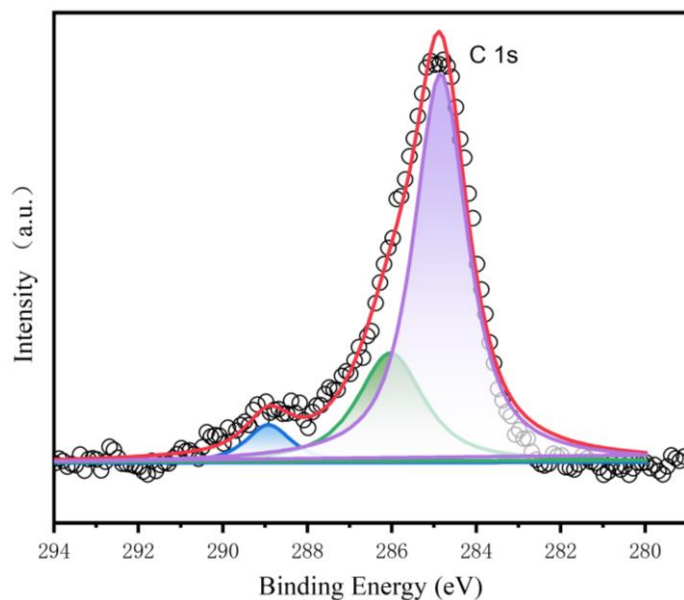

**Figure S2.** XPS narrow scans spectra of C1s.

**Commented [M1]:** Please check if there should be explanation for the colorful lines in the figure. Case of yes, please provide

**Table S2.** Comparison of properties of self-cleaning surfaces through synergistic action of superhydrophobicity and photocatalytic activity.

| Materials                                                  | Super-hydrophobicity                  | Photocatalytic activity                                       | Applications                                                 | Ref.                          |
|------------------------------------------------------------|---------------------------------------|---------------------------------------------------------------|--------------------------------------------------------------|-------------------------------|
| Dual-scale TiO <sub>2</sub> /ER/FAS                        | WCA >150°<br>$\theta_{SA} < 10^\circ$ | 0.6893 h <sup>-1</sup> for NR degradation under UV light      | Self-cleaning<br>Anti-icing                                  | Zhu et al. (2021) [7]         |
| FAS-SiO <sub>2</sub> /ZnO/PDMS                             | WCA = 151°<br>$\theta_{SA} = 2^\circ$ | 0.0073 h <sup>-1</sup> for RhB degradation under yellow light | Self-cleaning<br>Antifouling against stains<br>Antibacterial | Zhao et al. (2022) [8]        |
| TMCS-SiO <sub>2</sub> /TiO <sub>2</sub> /FEP               | WCA >150°<br>$\theta_{SA} < 30^\circ$ | 0.6931 h <sup>-1</sup> for MB degradation under UV light      | Self-cleaning<br>Antifouling against algae                   | Ansari and Nouri (2023) [9]   |
| CeO <sub>2</sub> /SiO <sub>2</sub> /TiO <sub>2</sub> /PDMS | WCA = 153.4°                          | NA for OA degradation under UV light                          | Self-cleaning<br>UV-blocking<br>Anti-reflection              | Keshavarzi et al. (2020) [10] |
| ZnO nanorods/PDMS                                          | WCA = 158.1°                          | 1.2166 h <sup>-1</sup> for MB degradation under UV light      | Self-Cleaning<br>Antibacterial                               | Wang et al. (2021b) [11]      |

|                                                       |                                           |                                                                                                        |                                                            |                           |
|-------------------------------------------------------|-------------------------------------------|--------------------------------------------------------------------------------------------------------|------------------------------------------------------------|---------------------------|
| TMCS-TiO <sub>2</sub> @SiO <sub>2</sub> /Paraloid B72 | WCA = ~150°                               | 5.7420 h <sup>-1</sup> for MB degradation under UV light                                               | Self-cleaning Anti-corrosion                               | Bai et al. (2022) [12]    |
| Ag <sub>2</sub> O/SiO <sub>2</sub> /TMCS              | WCA >150°<br>$\theta_{SA} < 8^\circ$      | NA for RhB degradation under visible light<br>0.1815 h <sup>-1</sup> for NO degradation under UV light | Self-cleaning Oil/water separation                         | (Rahman and R, 2022) [13] |
| TiO <sub>2</sub> /UltraEverDry                        | WCA = 152.9°                              | 0.0192 h <sup>-1</sup> for NO degradation under UV light                                               | Self-cleaning Antifouling against algae                    | Trávníčková et al. [14]   |
| TiO <sub>2</sub> /wrinkled-SiO <sub>2</sub>           | WCA = 156°<br>$\theta_{SA} = 6.6^\circ$   | 0.0854 h <sup>-1</sup> for MO degradation under UV light                                               | Self-cleaning Antifouling against stains<br>Anti-corrosion | Zhang et al. (2020) [15]  |
| TiO <sub>2</sub> /PDMS                                | WCA = 156.9°<br>$\theta_{SA} = 6.8^\circ$ | NA for OR/MB degradation under UV light                                                                | Self-cleaning Oil/water separation<br>Water Purification   | Yang et al. (2020a) [16]  |
| SiO <sub>2</sub> @CuO/HDTMS                           | WCA = 157.4°<br>$\theta_{SA} = 4.6^\circ$ | 0.5257 h <sup>-1</sup> for RhB degradation under UV light                                              | Self-cleaning Anti-corrosion                               | This work                 |

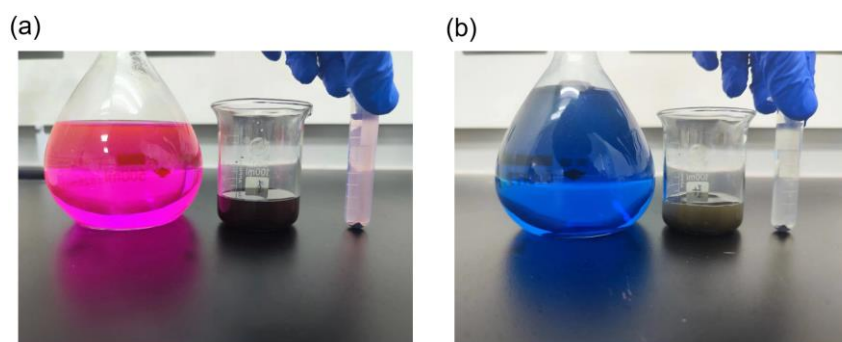

**Figure S3.** Before and after images of the degradation of (a) Rhodamine B and (b) Methylene Blue. The volumetric flask displays the color of the solution before degradation, while the centrifugal tube displays the color of the solution after degradation.

1. Wang, L.; Yang, J.; Zhu, Y.; Li, Z.; Sheng, T.; Hu, Y. M.; Yang, D.-Q., A study of the mechanical and chemical durability of Ultra-Ever Dry Superhydrophobic coating on low carbon steel surface. *Colloids and Surfaces A: Physicochemical and Engineering Aspects* **2016**, 497, 16-27.
2. Hermann, M.; Agrawal, P.; Koch, I.; Oleschuk, R., Organic-free, versatile sessile droplet microfluidic device for chemical separation using an aqueous two-phase system. *Lab on a Chip* **2019**, 19, (4), 654-664.
3. Oomen, P. E.; Mulder, J. P. S. H.; Verpoorte, E.; Oleschuk, R. D., Controlled, synchronized actuation of microdroplets by gravity in a superhydrophobic, 3D-printed device. *Analytica Chimica Acta* **2017**, 988, 50-57.
4. Hu, W.-H.; Yang, D.-Q.; Sacher, E., Improving the Mechanical Durability of Superhydrophobic Coating by Deposition onto a Mesh Structure. *Materials Research Express* **2018**, 5, (6), 065521.
5. Salahuddin, M.; Uddin, M. N.; Hwang, G.; Asmatulu, R., Superhydrophobic PAN nanofibers for gas diffusion layers of proton exchange membrane fuel cells for cathodic water management. *International Journal of Hydrogen Energy* **2018**, 43, (25), 11530-11538.
6. Samah, W.; Clain, P.; Rioual, F.; Fournaison, L.; Delahaye, A., Experimental investigation on the wetting behavior of a superhydrophobic surface under controlled temperature and humidity. *Colloids and Surfaces A: Physicochemical and Engineering Aspects* **2023**, 656, 130451.
7. Zhu, H.; Huang, Y.; Zhang, S.-W., A universal, multifunctional, high-practicability superhydrophobic paint for waterproofing grass houses. *NPG Asia Materials* **2021**, 13(1), 47.
8. Zhao, S.; Yang, X.-T.; Xu, Y.-Y., A sprayable superhydrophobic dental protectant with photo-responsive anti-bacterial, acid-resistant, and anti-fouling functions. *Nano Research* **2022**, 15(6), 5245-5255.
9. Ansari, A. and N.M. Nouri, A one step self-cleaning surface with robust superhydrophobic and photocatalytic properties: Electrostatic sprayed fluorinated ethylene propylene mixed with nano TiO<sub>2</sub>-SiO<sub>2</sub> particles. *Ceramics International* **2023**, 49(1), 57-66.
10. Keshavarzi, R.; Molabahrani, N.; Afzali, N., Improving Efficiency and Stability of Carbon-Based Perovskite Solar Cells by a Multifunctional Triple-Layer System: Antireflective, UV-Protective, Superhydrophobic, and Self-Cleaning. *Solar RRL* **2020**, 4(12), 2000491.
11. Wang, T., Lu, Z.-C.; Wang, X.-Q., A compound of ZnO/PDMS with photocatalytic, self-cleaning and antibacterial properties prepared via two-step method. *Applied Surface Science* **2021**, 550, 149286.
12. Bai, X., Yang, S.-Q.; Tan, C.-H., Synthesis of TiO<sub>2</sub> based superhydrophobic coatings for efficient anti-corrosion and self-cleaning on stone building surface. *Journal of Cleaner Production* **2022**, 380, 134975.

13. Rahman, A.; Rahman, A., Silver Oxide-Decorated Silica Nanoparticles for Visible-Light-Driven Photolytic Pollutant Degradation and Water-Oil Separation. *ACS Applied Nano Materials* **2022**, 5(1), 939-947.
14. Trávníčková, E.; Pijáková, B.; Marešová, D., Antifouling performance of photocatalytic superhydrophobic coatings against *Klebsormidium* alga. *Journal of Environmental Chemical Engineering* **2020**, 8(5), 104153.
15. Zhang, M.; Zhao, M.-W.; Chen, R.-R., Fabrication of the pod-like KCC-1/TiO<sub>2</sub> superhydrophobic surface on AZ31 Mg alloy with stability and photocatalytic property. *Applied Surface Science* **2020**, 499, 143933.
16. Yang, M.; Jiang, C.; Liu, W.-Q., A water-rich system of constructing durable and fluorine-free superhydrophobic surfaces for oil/water separation. *Applied Surface Science* **2020**, 507, 145165.
